# Supplementary material for: Betaine delays age‐related muscle loss by mitigating Mss51‐induced impairment in mitochondrial respiration via Yin Yang1
Source: PubMed Central journal article supplement (PMC11446699; doi:10.1002/jcsm.13558), 2024-08-26
Supplement: JCSM-15-2104-s003.pdf [file JCSM-15-2104-s003.pdf]

# Figure 1

NcmColor (P9006)

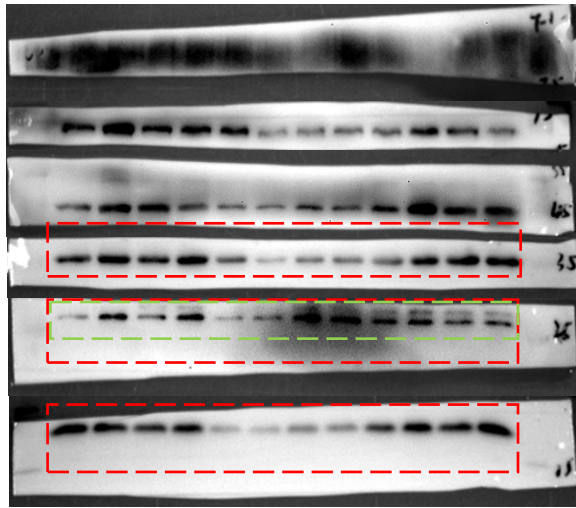

MtCO1(35KD)

Vdac1(25-35 KD)

Ndufb8 (15-25KD)

NcmColor (P9006)

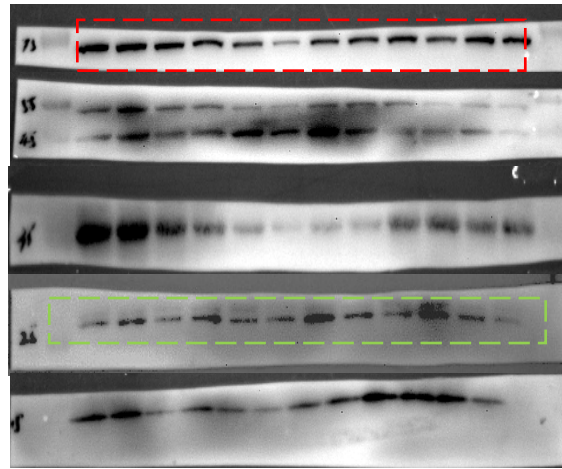

Sdha (75KD)

Pgc 1 $\alpha$  (100-110KD)

Thermos (26616)

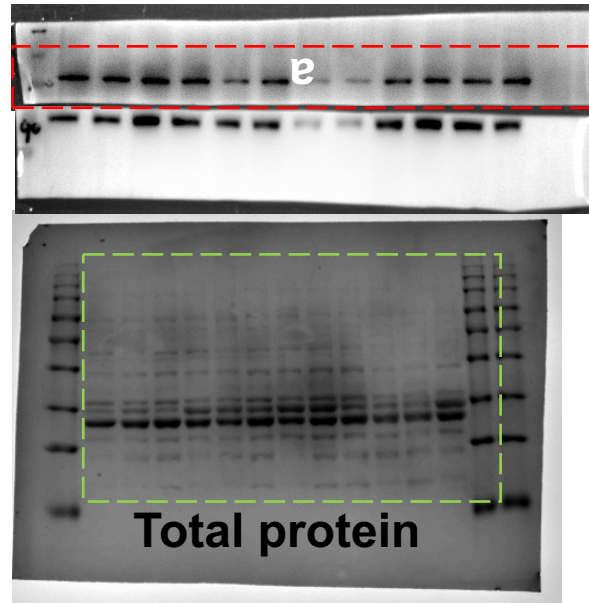

Total protein

NcmColor (P9006)

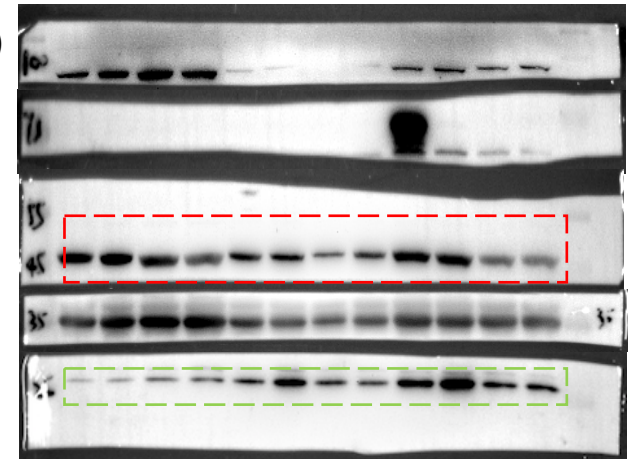

Uqcrc2  
(45-55 KD)

NcmColor (P9006)

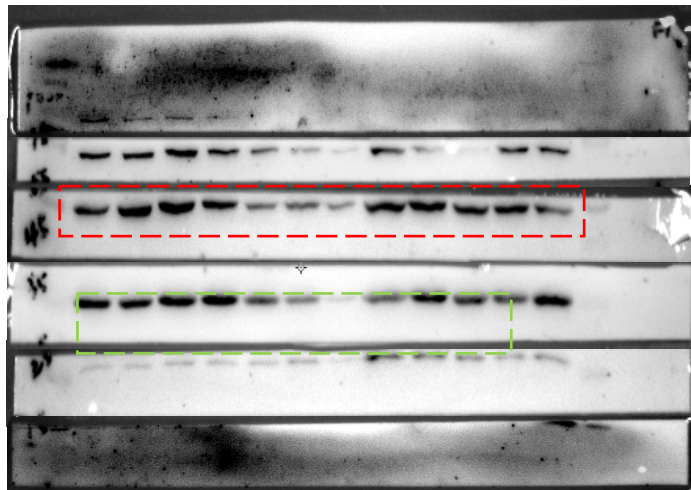

ATP5a(50-55KD)

Blots presented in the figure  
Blots used for normalization

# Figure 3

Thermos (26616)

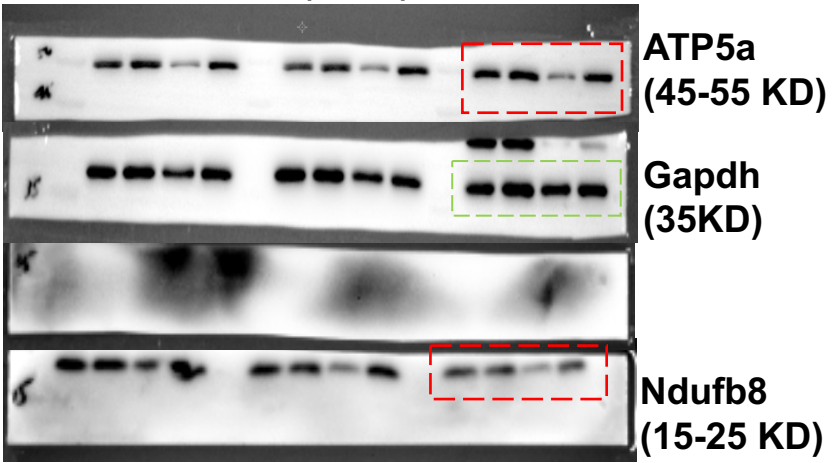

Thermos (26616)

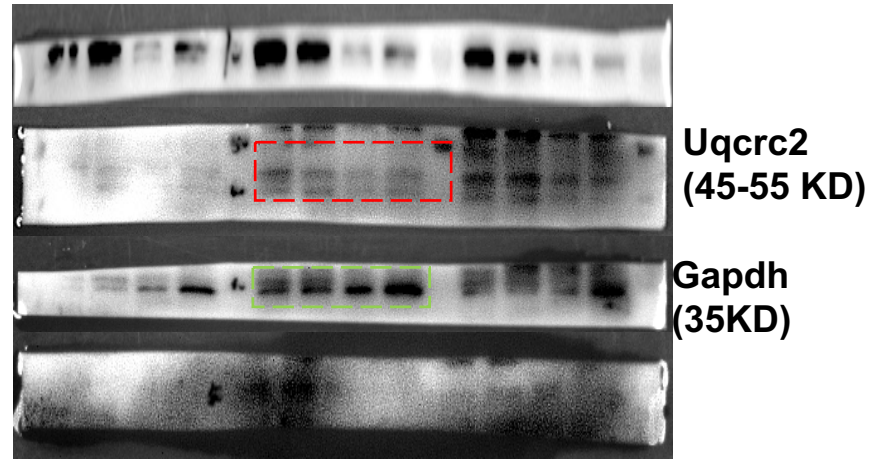

NcmColor (P9006)

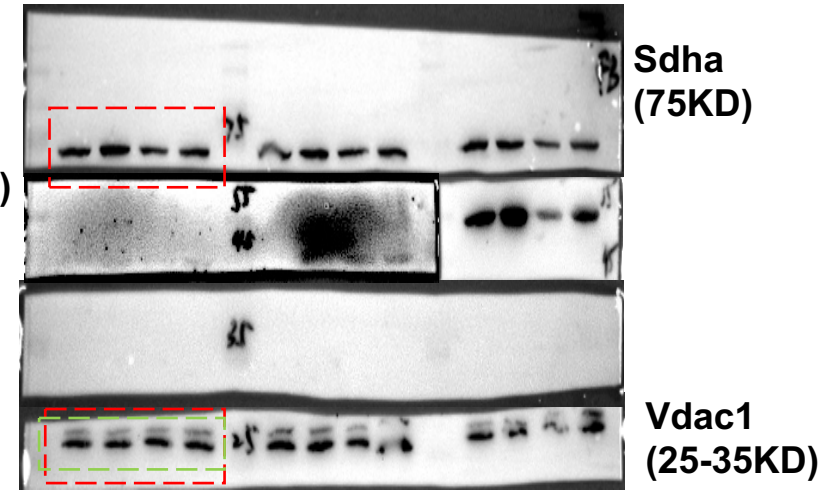

NcmColor (P9006)

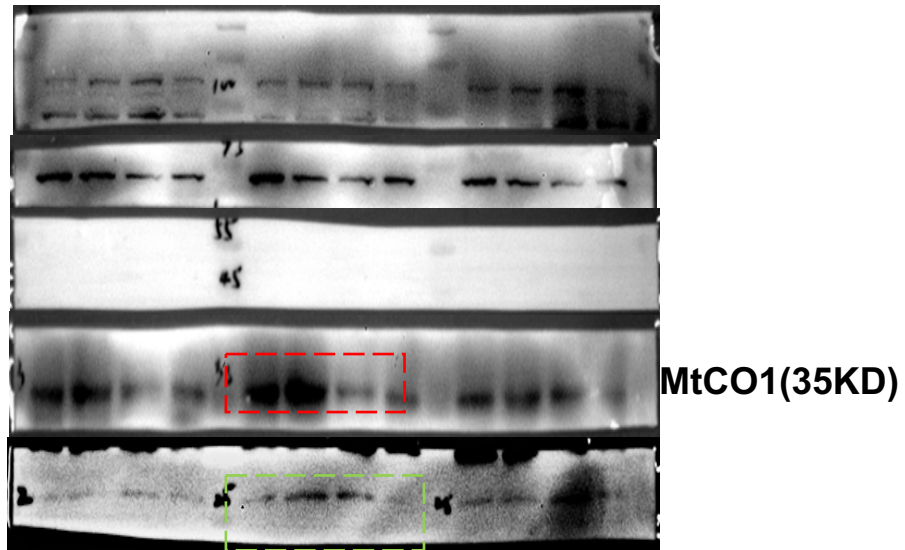

Pgc 1 $\alpha$  (100-110KD)

Thermos (26616)

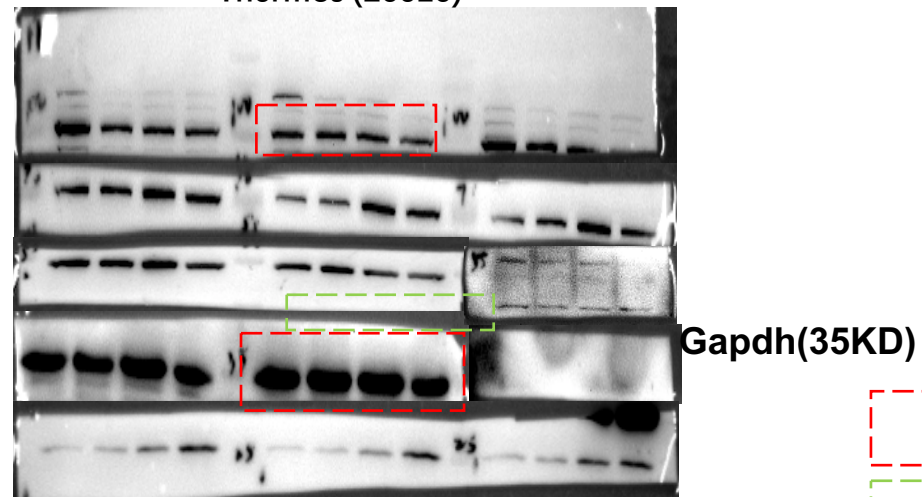

 Blots presented in the figure  
 Blots used for normalization

# Figure 5

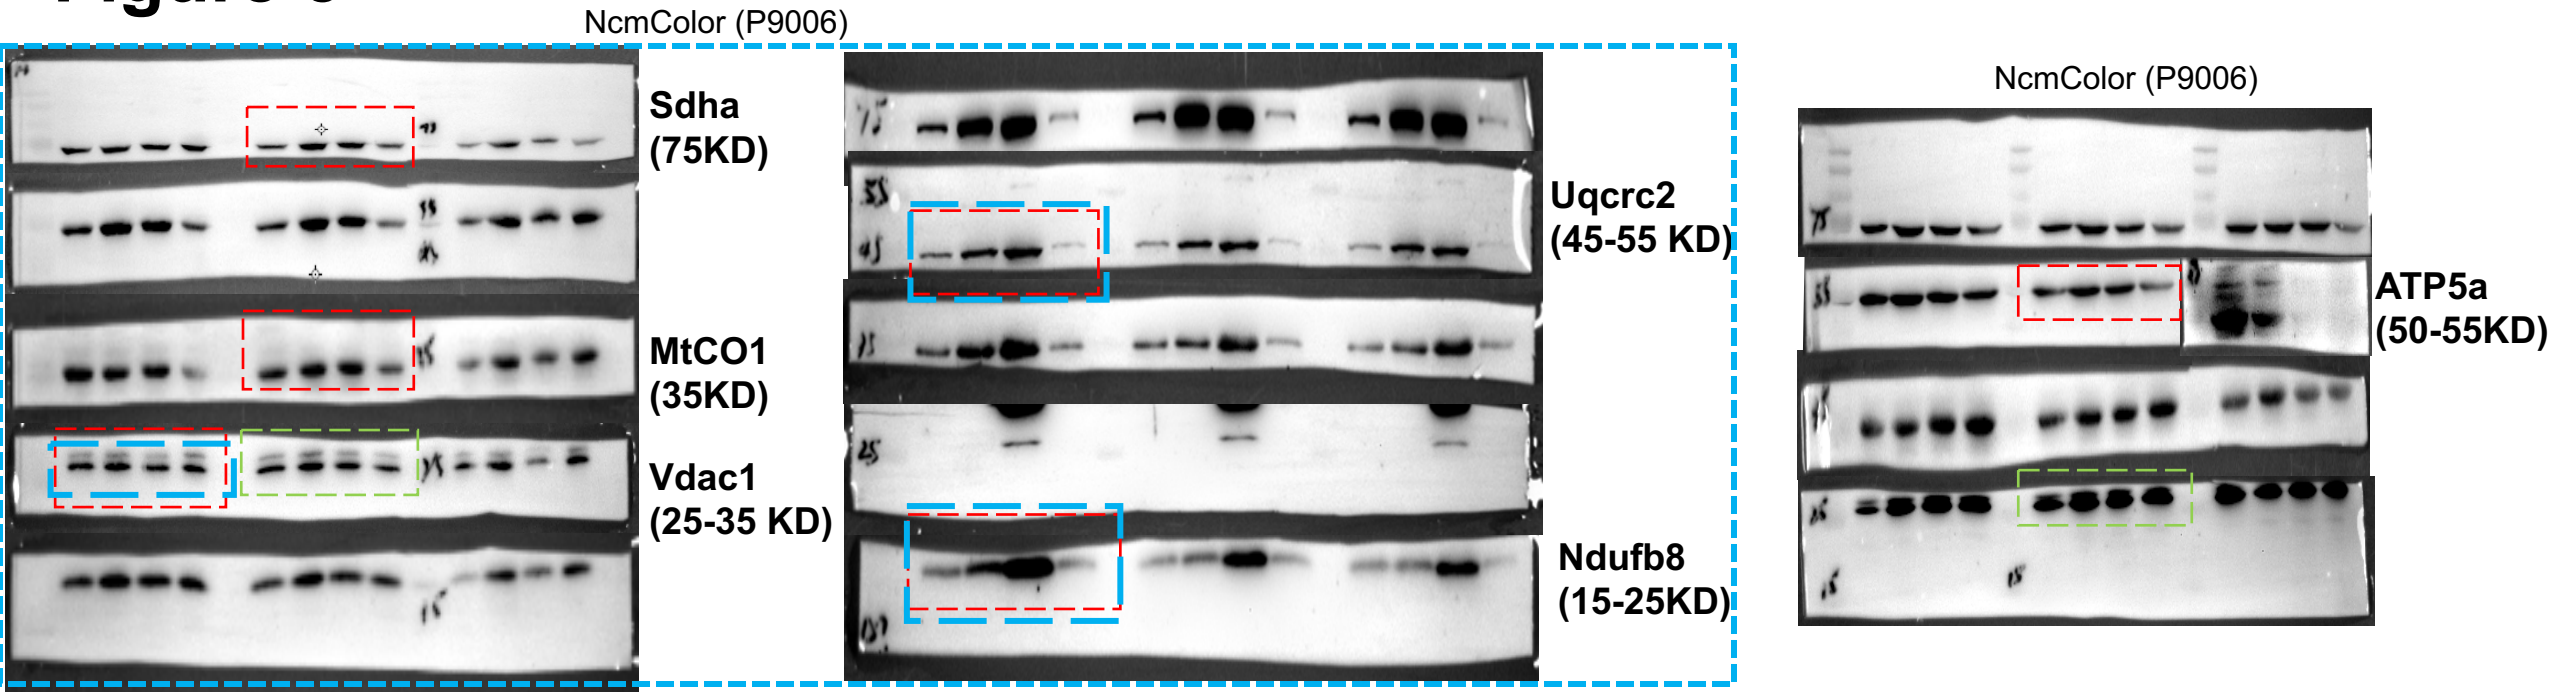

# Figure 4

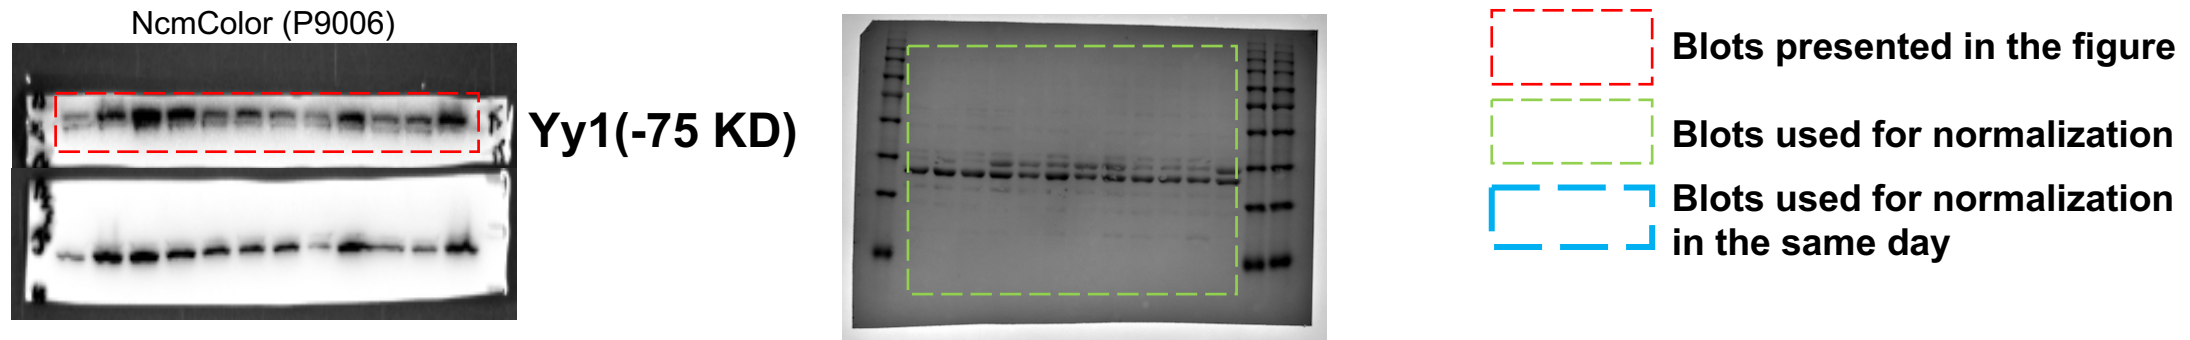

# Figure 7

NcmColor (P9006)

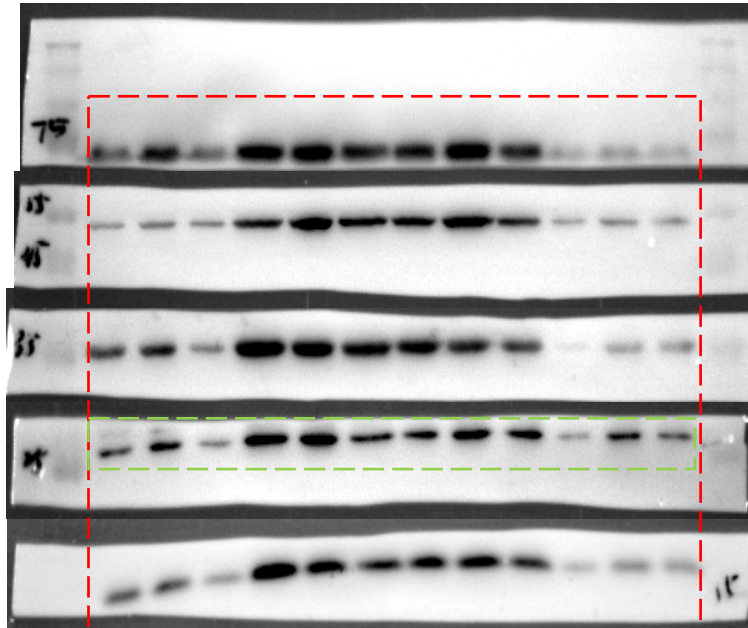

**Sdha (75KD)**  
**ATP5a (50-55KD)**  
**MtCO1(35KD)**  
**VDAC1(25-35KD)**  
**Ndufb8(15-25 KD)**

NcmColor (P9006)

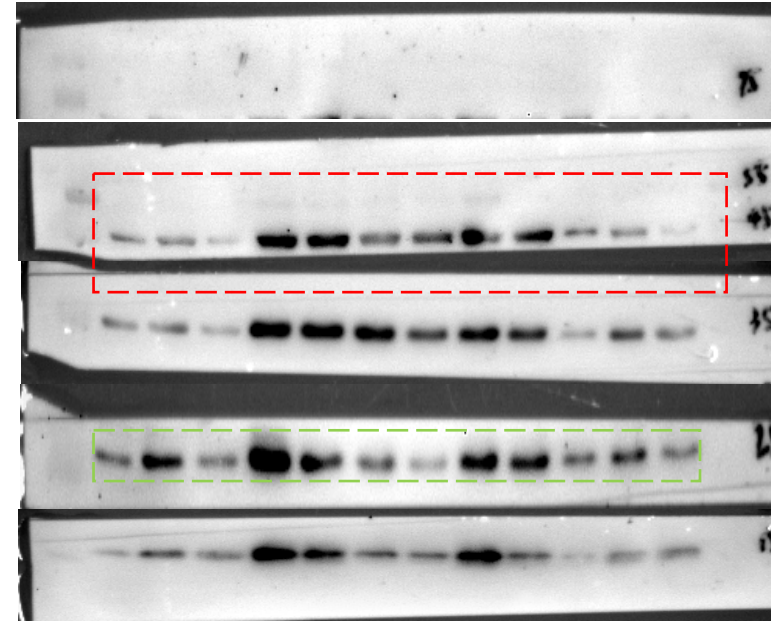

**Uqcrc2(45-55 KD)**

 Blots presented in the figure

 Blots used for normalization

**Fig S3 Yy1 OE/KD**

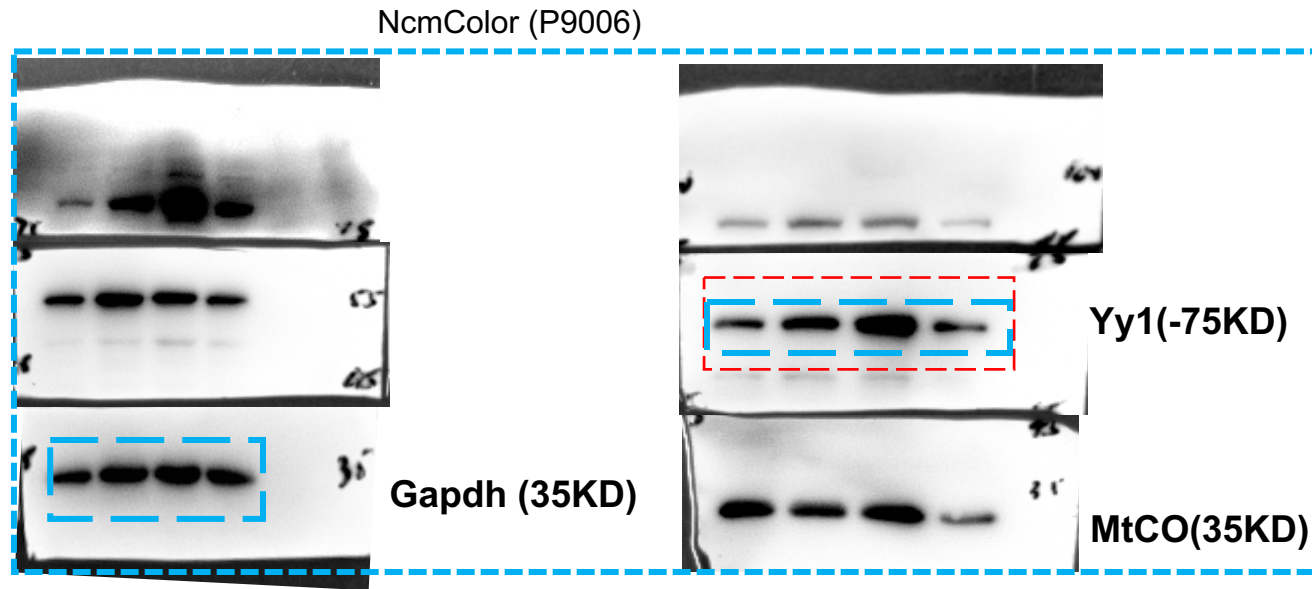

NcmColor (P9006)

**OE**

**KD**

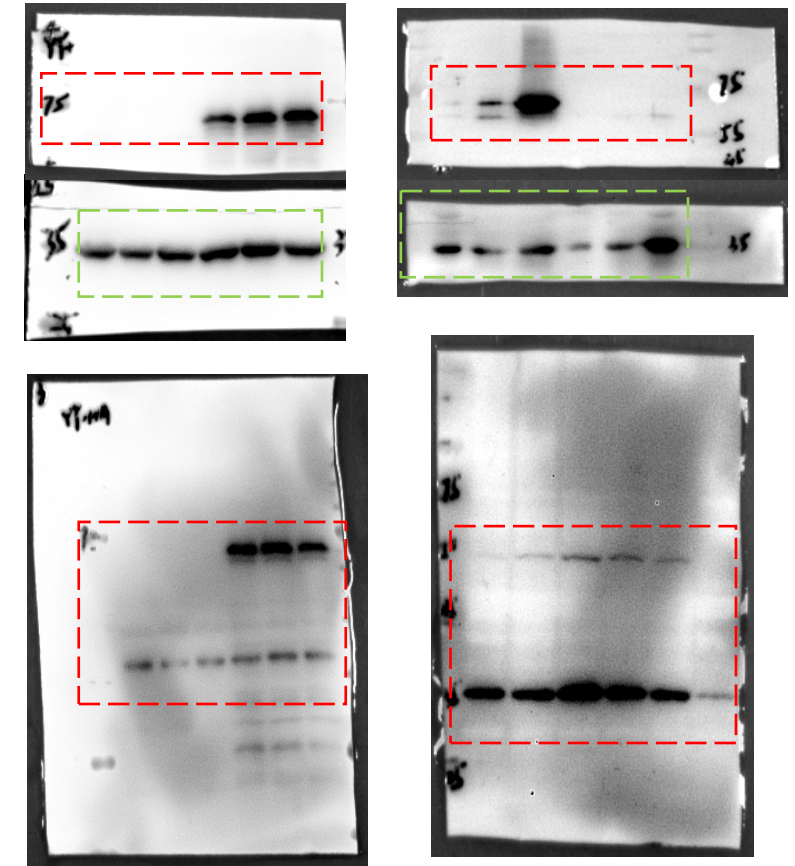

-  Blots presented in the figure
-  Blots used for normalization
-  Blots used for normalization in the same day
